# Supplementary material
Source: ML conference proceedings conference paper supplement (https://openreview.net/forum?id=KzMMv0OygD)
Supplement: supplementary_material [file attachment]

## A APPENDIX

The full prompt for building the meta-training set is as follows.

```
For the given text, design a task.
Each task contains three fields, instruction, input, and output.
instruction defines a task in natural language.
Instruction is a complete definition of how an input text (e.g., a
sentence or a document) is expected to be mapped to an output text.
Requiring instruction, input, and output are derived from text wherever
possible.
Input can be empty to indicate that the task has no input.
Instruction must be in imperative sentences formal.
Here are demonstrations where your response should be as different from
theirs as possible.
{}
#text#:  `` {}"
```
